# Supplementary material for: SO3H-functionalized mesoporous silica materials as solid acid catalyst for facile and solvent-free synthesis of 2H-indazolo[2,1-b]phthalazine-1,6,11-trione derivatives
Source: Royal Society of Chemistry journal article supplement (doi:10.1039/c5nj01733e), 2015-01-01

## Supplementary Information

### **SO<sub>3</sub>H-Functionalized Mesoporous Silica Materials as Solid Acid Catalyst for Facile and Solvent-free Synthesis of 2H-Indazolo[2,1-*b*]phthalazine-1,6,11-trione Derivatives**

Ali Alinasab Amiri, Shahrzad Javanshir,<sup>\*a</sup> Zahra Dolatkah and Mohammad G. Dekamin

*Heterocyclic chemistry Research Laboratory, Department of Chemistry, Iran University of Science and Technology, Tehran 16846-13114.*

| <b>Contents</b>                                                      | <b>Page</b> |
|----------------------------------------------------------------------|-------------|
| FT-IR spectrum of MCM-41                                             | 2           |
| FT-IR spectrum of SO <sub>3</sub> H-FMSM after recycling             | 2           |
| XRD analysis of SO <sub>3</sub> H-FMSM                               | 3           |
| N <sub>2</sub> adsorption-desorption (BET) of SO <sub>3</sub> H-FMSM | 3           |
| N <sub>2</sub> adsorption-desorption (BET) of MCM-41                 | 4           |
| BJH Adsorption Desorption dV/dlog(D) Pore Volume MCM-41              | 4           |
| BJH Adsorption dV/dlog(D) Pore Volume SO <sub>3</sub> H-FMSM         | 5           |
| BJH Desorption dV/dlog(D) Pore Volume SO <sub>3</sub> H-FMSM         | 5           |

# Supplementary Information

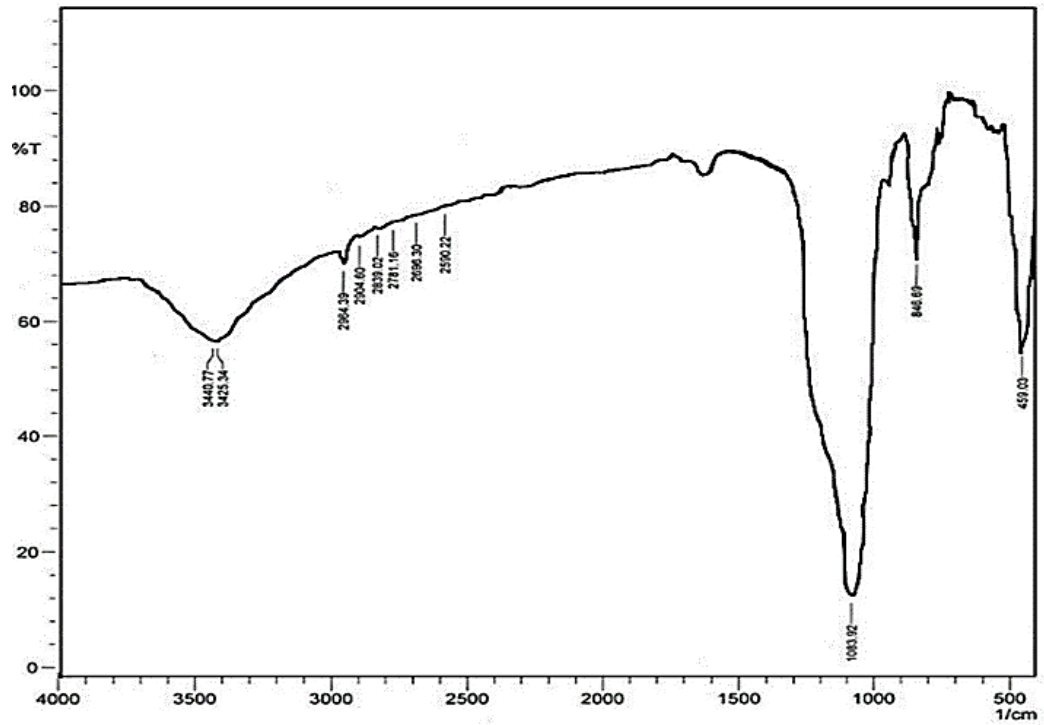

FT-IR spectrum of MCM-41

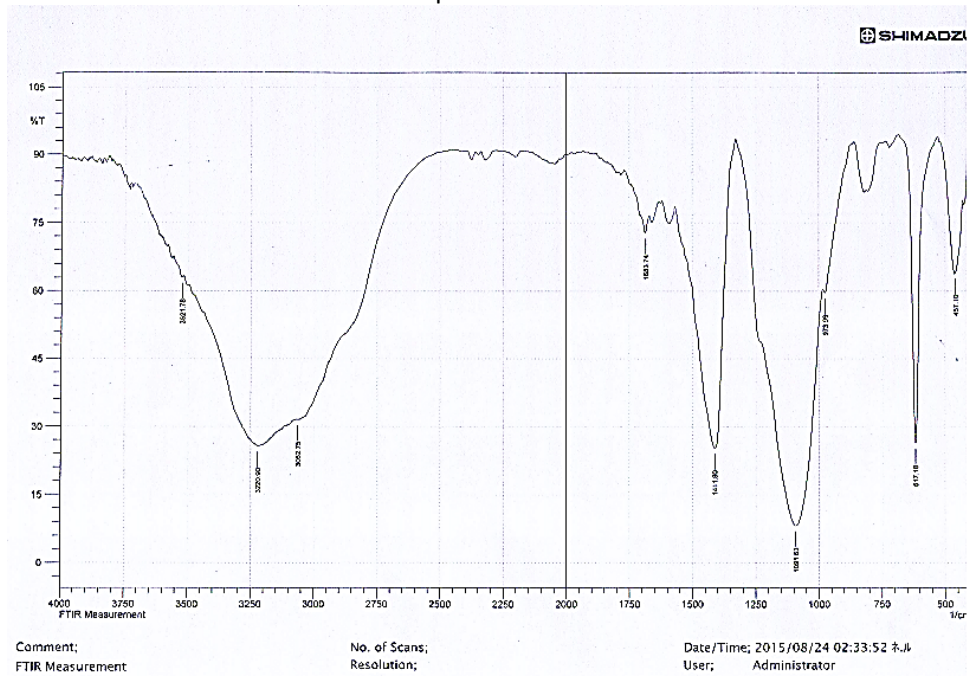

IR spectrum of SO<sub>3</sub>H-FMSM after recycling

## Supplementary Information

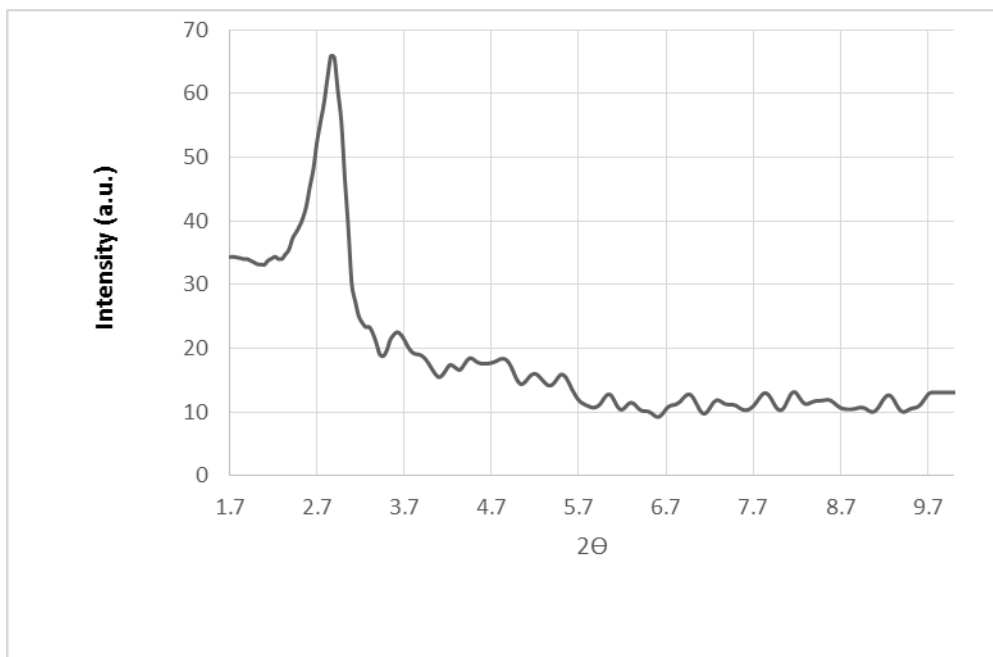

XRD analysis of SO<sub>3</sub>H-FMSM

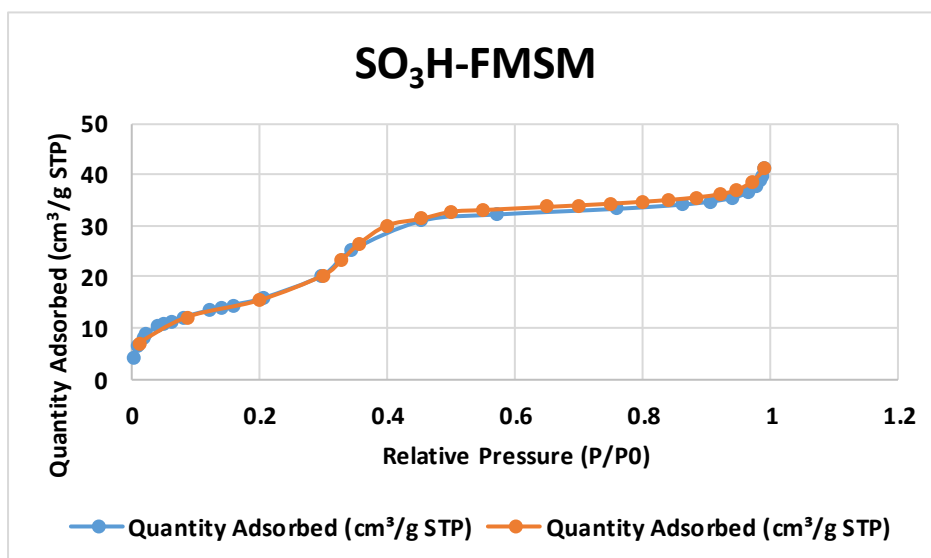

N<sub>2</sub> adsorption-desorption (BET) of SO<sub>3</sub>H-FMSM

## Supplementary Information

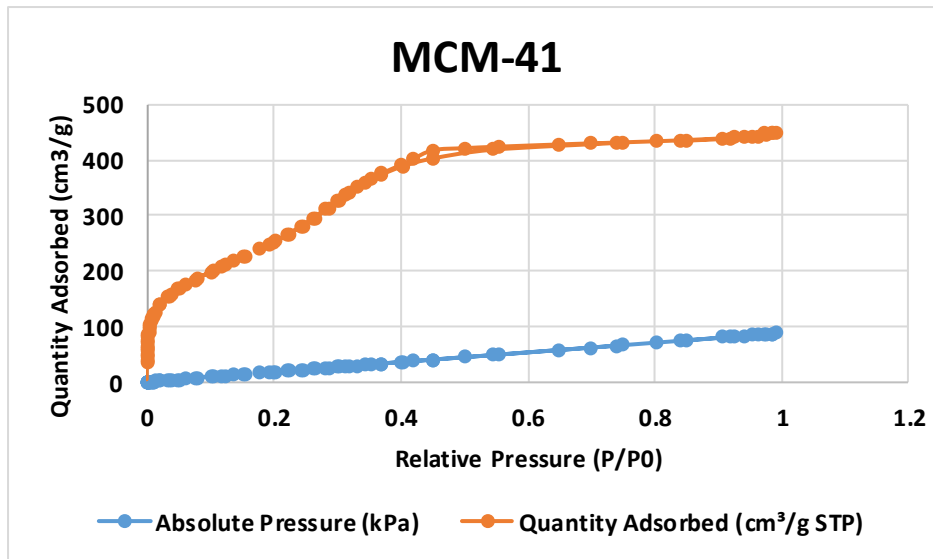

N<sub>2</sub> adsorption-desorption (BET) of MCM-41.

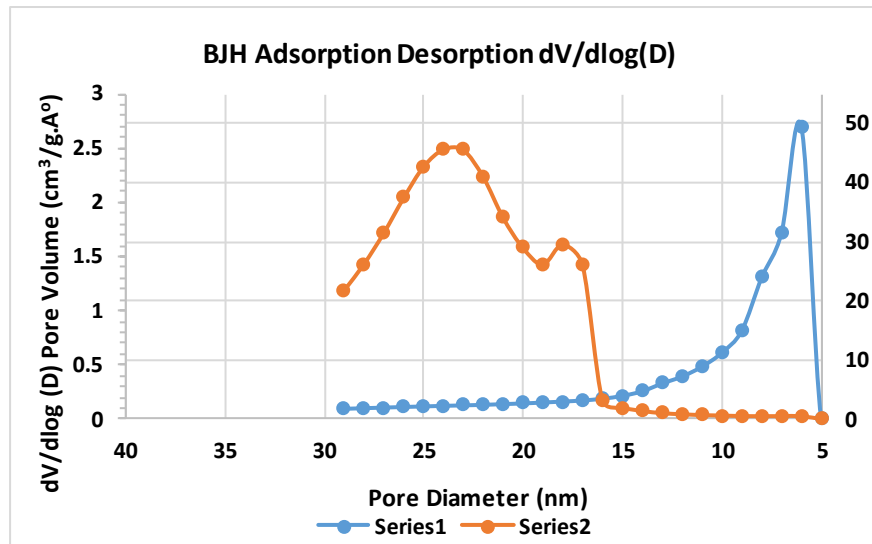

Series 1: MCM-41 Series 2: SO<sub>3</sub>H-FMSM

## Supplementary Information

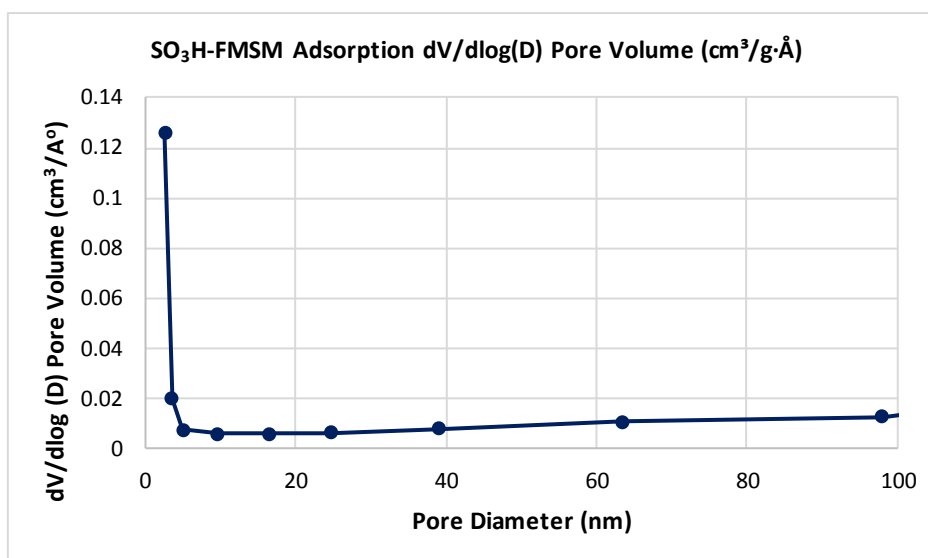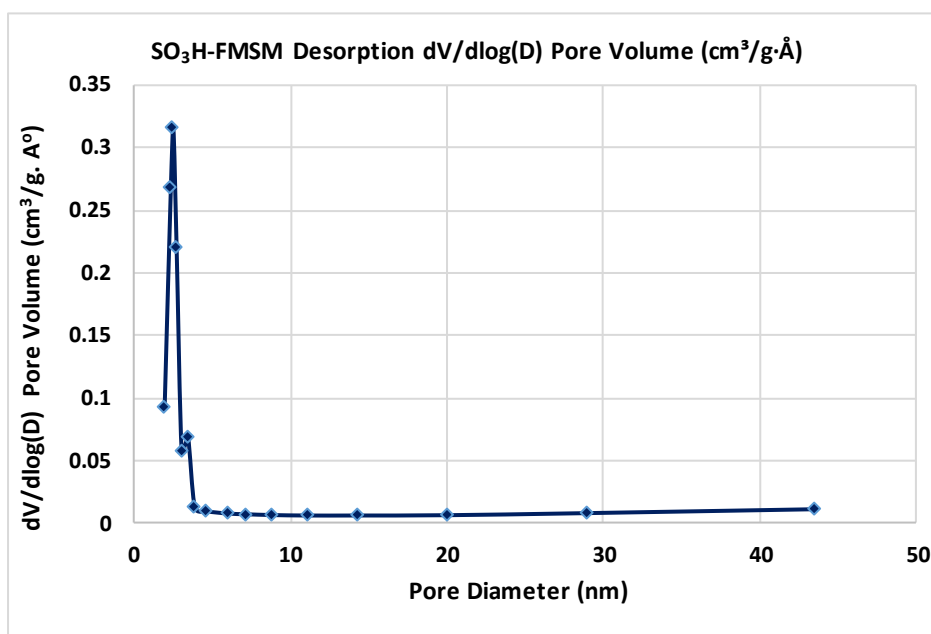

Supplement: c5nj01733e1.pdf [file c5nj01733e1.pdf]
